# Supplementary material for: Seminar program for postgraduate specialty training in general practice: proposal for a 5-year thematic catalogue
Source: PubMed Central journal article supplement (PMC5704617; doi:10.3205/zma001137), 2017-11-15
Supplement: JME-34-60-s-001.pdf [file JME-34-60-s-001.pdf]

**Attachment 1a: Topics: *Practice management / practice work flow / standardized documentation forms/quality management***

| <b><i>Practice management/practice work flow/standardized documentation forms/quality management</i></b> | Weighting      | Desired lesson share |
|----------------------------------------------------------------------------------------------------------|----------------|----------------------|
|                                                                                                          | <i>MV (SD)</i> | <i>MV (SD)</i>       |
| Practice management                                                                                      | 3.0 (0.0)      | 2.4 (1.5)            |
| Technical examinations in general practice – what is necessary?                                          | 3.0 (0.0)      | 0.8 (0.8)            |
| Founding a new practice                                                                                  | 2.8 (0.4)      | 1.6 (1.0)            |
| Team structure / daily life in the practice                                                              | 2.8 (0.4)      | 1.4 (1.2)            |
| Employment opportunities for general practitioners                                                       | 2.6 (0.4)      | 1.0 (1.1)            |
| Writing prescriptions, filling out sick leave forms                                                      | 2.4 (1.2)      | 2.0 (1.7)            |
| Scholarship and decision-making in patient care                                                          | 2.4 (1.2)      | 1.4 (1.9)            |
| Error management                                                                                         | 2.4 (1.2)      | 1.0 (0.9)            |
| Writing physiotherapy prescriptions                                                                      | 2.4 (1.2)      | 0.2 (0.4)            |
| Prescribing assistive tools and devices                                                                  | 2.2 (1.2)      | 1.0 (1.3)            |
| Personal time management / work-life balance / compatibility of family and career                        | 2.2 (1.2)      | 1.0 (1.3)            |
| Submitting rehabilitation requests                                                                       | 2.0 (1.1)      | 0.6 (0.8)            |
| Responsibilities of the Association of Statutory Health Insurance Physicians/Medical Association         | 1.8 (1.2)      | 0.8 (0.8)            |
| Crisis management                                                                                        | 1.8 (1.2)      | 0.6 (0.8)            |
| Ambulatory cooperation opportunities / practice models                                                   | 1.8 (1.2)      | 0.6 (0.5)            |
| Legal questions / legal aspects / practice management                                                    | 1.6 (1.4)      | 0.8 (0.8)            |
| Pharmaceutical guidelines                                                                                | 1.6 (1.2)      | 0.6 (0.8)            |
| Request short-term care                                                                                  | 1.4 (1.4)      | 0.6 (0.8)            |
| Legal guidelines of a patient's advance and care directive                                               | 1.4 (1.2)      | 0.4 (0.5)            |
| Avoid billing problems                                                                                   | 1.4 (1.0)      | 0.2 (0.4)            |

**Attachment 1b: Topics: *Common acute and chronic diseases***

| <b><i>Common acute and chronic diseases</i></b>    | Weighting      | Desired lesson share |
|----------------------------------------------------|----------------|----------------------|
|                                                    | <i>MV (SD)</i> | <i>MV (SD)</i>       |
| Rheumatological diseases                           | 3.0 (0.0)      | 2.0 (1.5)            |
| Diabetes mellitus (hypo- / hyperglycemia)          | 2.8 (0.4)      | 2.2 (1.6)            |
| Apoplexy/ Cerebrovascular disease                  | 2.8 (0.4)      | 2.2 (1.0)            |
| Gastritis / ulcer / reflux / esophagitis           | 2.8 (0.4)      | 1.8 (1.2)            |
| Bronchial asthma                                   | 2.8 (0.4)      | 1.8 (0.8)            |
| COPD                                               | 2.8 (0.4)      | 1.4 (0.8)            |
| Hypertension                                       | 2.6 (0.8)      | 2.2 (1.0)            |
| Disease of the kidney                              | 2.6 (0.8)      | 1.6 (0.4)            |
| Cardiac insufficiency                              | 2.6 (0.8)      | 1.4 (0.8)            |
| Coronary heart disease                             | 2.6 (0.8)      | 1.4 (0.8)            |
| Varicose veins / ulcus cruris venosum / thrombosis | 2.6 (0.5)      | 2.2 (1.2)            |
| Diabetic foot syndrome                             | 2.6 (0.5)      | 1.8 (1.2)            |
| Further rheumatic diseases                         | 2.4 (1.2)      | 1.6 (1.7)            |
| Thyroid diseases                                   | 2.4 (0.8)      | 1.8 (0.4)            |

|                                       |           |           |
|---------------------------------------|-----------|-----------|
| Osteoporosis                          | 2.2 (0.8) | 1.2 (0.4) |
| Sleep apnea syndrome                  | 2.2 (0.8) | 1.0 (0.6) |
| Peripheral arterial occlusive disease | 2.2 (0.8) | 1.0 (0.6) |
| Heart rhythm disturbances             | 1.8 (1.2) | 1.0 (0.9) |
| Prostate hyperplasia                  | 1.8 (0.8) | 1.0 (0.6) |

**Attachment 1c: Topics: *Communication, neurological, psychological and psychiatric consultations***

| <b><i>Neurological and psychiatric consultations</i></b> | Weighting      | Desired lesson share |
|----------------------------------------------------------|----------------|----------------------|
|                                                          | <i>MV (SD)</i> | <i>MV (SD)</i>       |
| The difficult patient                                    | 2.8 (0.4)      | 1.0 (0.6)            |
| Delivering bad news                                      | 2.6 (0.8)      | 1.0 (0.6)            |
| Addiction in general practice                            | 2.4 (1.2)      | 2.2 (1.6)            |
| Depression                                               | 2.4 (1.2)      | 1.8 (1.3)            |
| Dementia                                                 | 2.4 (1.2)      | 1.8 (1.3)            |
| Sleep disturbance                                        | 2.4 (1.2)      | 1.0 (0.6)            |
| Anxiety and panic disorder                               | 2.2 (1.2)      | 1.0 (0.9)            |
| Paralysis and sensory disorder                           | 2.2 (1.0)      | 1.4 (0.5)            |
| Somatization disorder                                    | 1.8 (1.5)      | 2.4 (1.9)            |
| Convulsion / cramps                                      | 1.6 (1.2)      | 0.4 (0.5)            |
| Culturally induced social problems                       | 1.8 (1.2)      | 1.6 (1.4)            |
| Memory disorders/ concentration disturbance              | 1.4 (1.4)      | 0.2 (0.4)            |

**Attachment 1d: Topics: *Common medical problems including minor problems***

| <b><i>Common medical problems including minor problems</i></b> | Weighting      | Desired lesson share |
|----------------------------------------------------------------|----------------|----------------------|
|                                                                | <i>MV (SD)</i> | <i>MV (SD)</i>       |
| Stomach ache / nausea                                          | 3.0 (0.0)      | 2.8 (1.2)            |
| Back pain                                                      | 3.0 (0.0)      | 2.6 (1.5)            |
| Chronic pain                                                   | 3.0 (0.0)      | 2.4 (1.3)            |
| Chest pain                                                     | 3.0 (0.0)      | 2.0 (1.1)            |
| Cough                                                          | 3.0 (0.0)      | 1.6 (1.2)            |
| Shortness of breath                                            | 3.0 (0.0)      | 1.2 (0.4)            |
| Dizziness                                                      | 2.8 (0.4)      | 2.2 (1.2)            |
| Chronic wounds                                                 | 2.8 (0.4)      | 2.2 (0.8)            |
| Incontinence / chronic bladder weakness                        | 2.6 (0.8)      | 1.4 (0.5)            |
| Tiredness                                                      | 2.6 (0.5)      | 1.2 (0.5)            |
| Acute pain                                                     | 2.4 (1.2)      | 0.4 (0.5)            |
| Threat to a child's welfare                                    | 2.2 (1.2)      | 1.8 (2.0)            |
| Earache / facial pain                                          | 2.4 (0.8)      | 2.2 (1.0)            |
| Acute infection / fever                                        | 2.4 (0.8)      | 1.8 (0.8)            |
| Anal complaints                                                | 2.4 (0.8)      | 1.2 (0.4)            |
| Syncope / loss of consciousness                                | 2.2 (1.0)      | 1.2 (0.4)            |
| Acute injuries                                                 | 2.2 (0.8)      | 1.6 (0.5)            |
| Skin diseases: itchiness / unclear skin changes                | 2.0 (1.3)      | 2.3 (1.3)            |

|                                            |           |           |
|--------------------------------------------|-----------|-----------|
| Developmental disorder in childhood        | 2.0 (1.3) | 1.6 (1.9) |
| Burning when urinating                     | 2.0 (1.0) | 1.0 (1.0) |
| Diarrhea                                   | 2.0 (0.9) | 1.0 (0.6) |
| The red eye / impaired vision              | 1.8 (1.5) | 1.6 (1.0) |
| Bloody secretion / hemoptysis              | 1.8 (1.5) | 0.4 (0.5) |
| Peculiar hemogram / increased liver values | 1.8 (1.2) | 1.2 (0.8) |
| Loss of voice / hoarseness                 | 1.8 (1.2) | 0.8 (0.8) |
| Joint pain / joint swelling                | 1.8 (1.2) | 0.4 (0.5) |
| Uncertain lymph node swelling              | 1.8 (1.0) | 1.4 (0.5) |
| Swollen leg / ankle edemas                 | 1.8 (0.8) | 1.2 (0.4) |
| Nosebleed                                  | 1.6 (1.5) | 0.2 (0.4) |
| The sick child                             | 1.6 (1.4) | 0.8 (1.0) |
| Restless legs                              | 1.6 (1.0) | 0.8 (0.8) |
| Complaints of the mouth, tongue and lips   | 1.4 (1.0) | 1.0 (0.6) |
| Heart: palpitations                        | 1.4 (1.0) | 0.6 (0.5) |
| Swallowing disorders                       | 1.4 (0.8) | 1.0 (0.6) |
| Skin Ulcers                                | 1.2 (1.5) | 0.4 (0.5) |

**Attachment 1e: General Practitioner 2.0/ General practitioner work flow**

| <b>Topics: General Practitioner 2.0/ General practitioner work flow</b> | Weighting      | Desired lesson share |
|-------------------------------------------------------------------------|----------------|----------------------|
|                                                                         | <i>MV (SD)</i> | <i>MV (SD)</i>       |
| Pharmacotherapy for the elderly                                         | 3.0 (0.0)      | 3.0 (1.3)            |
| Polypharmacy/ medication management                                     | 3.0 (0.0)      | 2.0 (1.4)            |
| Geriatric assessment / falls                                            | 3.0 (0.0)      | 1.6 (0.8)            |
| Examination shoulder joint                                              | 2.6 (0.8)      | 1.6 (1.4)            |
| Home visits                                                             | 2.4 (1.2)      | 0.8 (1.0)            |
| Guidelines                                                              | 2.4 (1.2)      | 0.6 (0.8)            |
| Preventive services for children and adolescents                        | 2.2 (2.2)      | 1.2 (0.8)            |
| Cancer diseases in General Practice                                     | 2.2 (0.8)      | 2.0 (1.7)            |
| Examination hip, knee                                                   | 2.0 (1.6)      | 1.8 (1.7)            |
| Patient in a nursing home                                               | 2.0 (1.3)      | 1.6 (1.3)            |
| Sexuality and family planning                                           | 2.0 (1.1)      | 0.6 (0.8)            |
| Death certificate                                                       | 1.8 (1.5)      | 1.2 (1.5)            |
| Vaccination                                                             | 1.8 (1.5)      | 1.2 (1.2)            |
| Individual health services                                              | 1.8 (1.5)      | 0.8 (0.8)            |
| Palliative medicine / terminal care / grief work                        | 1.8 (1.2)      | 1.6 (1.0)            |
| Prevention                                                              | 1.6 (1.4)      | 2.2 (2.3)            |
| Documentation in General Practitioner's office                          | 1.6 (1.4)      | 1.0 (0.9)            |
| Reanimation in General Practitioner's office                            | 1.6 (1.4)      | 1.0 (0.9)            |
| Diet, overweight / eating disorders / food intolerance                  | 1.6 (1.2)      | 1.2 (0.8)            |
| Domestic violence                                                       | 1.4 (1.2)      | 1.2 (1.2)            |
| Patient oriented evidence-based research                                | 1.4 (1.2)      | 1.0 (0.9)            |
| Legal representative for health care                                    | 1.4 (1.2)      | 0.8 (0.8)            |
| Menopausal complaints of the woman                                      | 1.4 (1.2)      | 0.8 (0.8)            |

|                                                                         |           |           |
|-------------------------------------------------------------------------|-----------|-----------|
| Specialist physician examination / prerequisite / application / process | 1.2 (1.5) | 0.6 (0.8) |
| Labor law questions from doctors in training                            | 1.2 (1.5) | 0.4 (0.5) |

**Attachment 1f: Additional teaching topics and subjects that can be optionally used / as well as topics that were not fully assessed**

|                                                            | Weighting      | Desired lesson share |
|------------------------------------------------------------|----------------|----------------------|
| <i><b>Add on (additional module for special needs)</b></i> | <i>MV (SD)</i> | <i>MV (SD)</i>       |
| Motivational interviewing skills                           | 3.0 (3.0)      | 3,2 (1.6)            |
| Communication behavior                                     | 2.4 (1.2)      | 0.8 (0.8)            |
| Relationship and discussion                                | 2.4 (1.2)      | 0.6 (0.5)            |
| Interaction and patient management                         | 2.4 (1.2)      | 0.6 (0.5)            |
| ECG assessment                                             | 1.2 (1.2)      | 1.0 (0.9)            |
| Pregnancy / breastfeeding                                  | 1.2 (1.2)      | 1.0 (0.9)            |
| Prescribing practice supply                                | 1.2 (1.0)      | 0.4 (0.5)            |
| Burnout                                                    | 1.2 (1.0)      | 0.8 (0.8)            |
| Delirium                                                   | 1.2 (0.8)      | 0.6 (0.5)            |
| Psychoses                                                  | 1.2 (0.8)      | 1.2 (1.0)            |
| Vaginal discharge / dysmenorrhea / genital mycosis         | 1.0 (1.3)      | 0.4 (0.4)            |
| Erectile dysfunction of the man                            | 1.0 (1.3)      | 0.4 (0.5)            |
| Sexually transmitted diseases / HIV                        | 1.0 (1.3)      | 0.2 (0.4)            |
| Balint group attendance                                    | 0.8 (1.2)      | 0.4 (0.8)            |
| Traumatization                                             | 0.8 (0.8)      | 0.8 (0.8)            |
| Trembling                                                  | 0.8 (0.8)      | 0.2 (0.4)            |
| Personality changes / behavioral disturbances              | 0.6 (0.8)      | 0.4 (0.5)            |
| Enuresis                                                   | 0.6 (0.5)      | 0.4 (0.5)            |
| Thought disorder                                           | 0.4 (0.5)      | 0.0 (0.0)            |
| Jaw complaints                                             | 0.4 (0.5)      | 0.2 (0.4)            |
| Polydipsia                                                 | 0.2 (0.4)      | 0.0 (0.0)            |
| Epileptic status                                           | 0.2 (0.4)      | 0.2 (0.4)            |
